# Supplementary material for: Pore size effects on high-efficiency proton conduction in three stable 3D Al-based MOFs modified with imidazole
Source: Royal Society of Chemistry journal article supplement (doi:10.1039/d3qi01941a), 2023-01-01
Supplement: d3qi01941a1.pdf [file d3qi01941a1.pdf]

# Pore size effect on high-efficiency proton conduction in three stable 3D Al-based MOFs modified with imidazole

*Lu Zhang, ‡<sup>a</sup> Xiaoxue Ma, ‡<sup>a</sup> Xin Li, <sup>a</sup> Ronghua Liu, <sup>a</sup> Xin Zhao, <sup>a</sup> Hongguo Hao, <sup>a\*</sup> Hui Yan, <sup>a\*</sup> Hongjie Zhu, <sup>a</sup> Huawei Zhou, <sup>a</sup> Dichang Zhong <sup>b</sup>*

<sup>a</sup>Shandong Provincial Key Laboratory of Chemical Energy Storage and Novel Cell Technology, School of Chemistry and Chemical Engineering, School of Pharmacy, Liaocheng University, Liaocheng 252059, China.

<sup>b</sup>Institute for New Energy Materials and Low Carbon Technologies School of Materials Science and Engineering Tianjin University of Technology, Tianjin 300384, China.

‡ Lu Zhang and Xiaoxue Ma contributed equally to this work.

\* Corresponding Authors E-mail: hhg207@126.com; yanhui@lcu.edu.cn

# Supplementary Information

## Contents

|                                                      |    |
|------------------------------------------------------|----|
| 1. Materials and Instrumentations. ....              | 1  |
| 2. Material Synthesis and Structure.....             | 1  |
| 2.1 Synthesis of <b>1</b> . ....                     | 1  |
| 2.2 Synthesis of <b>2</b> . ....                     | 2  |
| 2.3 Synthesis of <b>3</b> . ....                     | 2  |
| 2.4 Synthesis of Im@ <b>1-3</b> . ....               | 3  |
| 3. Proton Conduction Measurement. ....               | 3  |
| 4. The Grand Canonical Monte Carlo Simulations. .... | 4  |
| 5. AC Impedance Analysis. ....                       | 5  |
| 6. References. ....                                  | 25 |

## 1. Materials and Instrumentations.

All reagents and solvents were obtained commercially and used without any purification. The powder X-ray diffraction patterns (PXRD) were recorded on a Rigaku D/Max-2500 diffractometer and the intensity data were recorded by continuous scan in a  $2\theta$  mode from 3 to  $50^\circ$ , with a step size of 0.1 and a scan speed of  $20 \text{ min}^{-1}$ . The simulated PXRD patterns were produced using the Mercury V1.4 program and single-crystal diffraction data. A PerkinElmer Diamond SII thermal analyzer was utilized for Thermogravimetric analysis (TGA) tests from 298 to 1073 K, at a heating rate of  $10 \text{ K min}^{-1}$  under a nitrogen atmosphere. Infrared spectra were recorded on a Nicolet 6700 FT-IR spectrophotometer with KBr pellets in the range  $4000\text{-}400 \text{ cm}^{-1}$  region. X-ray photoelectron spectroscopy (XPS) characterization was carried out by using a Thermo-Fisher Scientific ESCALAB spectrometer with Al  $K\alpha$  X-rays (1486.6 eV) as the light source and the C1s peak at 284.6 eV as internal standard. Element distribution was characterized by Hitachi SEM S-4800. Energy-dispersive X-ray spectroscopy (EDS) and element mapping analyses were recorded on a Thermo-Fisher Scientific FIB-SEM GX4. Nitrogen adsorption-desorption isotherms were measured at 77 K on micromeritics 3Flex were measured at 298 K.

## 2. Material Synthesis and Structure.

Three Al-MOFs, **DUT-5 (1)**, **DUT-4 (2)**, and **NOTT-300(Al) (3)**, were prepared in light of the early literature methods. CCDC 691979 (for **1**) 691978 (for **2**), and 1856081 (for **3**) contain the supplementary crystallographic data for this paper. These datas can be obtained free of charge from The Cambridge Crystallographic Data Centre.

### 2.1 Synthesis of 1.

4,4-biphenyldicarboxylic acid also known as  $\text{H}_2\text{BPDC}$  linker (97%, 0.26 g, 1.20 mmol) was dissolved in 30 mL DMF (Fischer, analytical reagent grade).  $\text{Al}(\text{NO}_3)_3 \cdot 9\text{H}_2\text{O}$  (98%, 0.52 g, 1.40 mmol) was added and the mixture was filled in a 250 mL Teflon liner, placed in an autoclave, heated to  $120^\circ\text{C}$  for 24 h and cooled to room temperature. After the product was separated by centrifugation, the sediment was washed with DMF for three times. The product was dried in an oven. 0.49 g (95.6%)

for **1**.  $[\text{Al}(\text{OH})(\text{C}_{14}\text{O}_4\text{H}_8)(\text{DMF})_{1.8}](\text{H}_2\text{O})_{3.6}$ : calc (%): C, 49.68; H, 3.03; N, 5.54, found (%): C, 49.60; H, 3.09; N, 5.51. FT-IR (4000-400  $\text{cm}^{-1}$ ): 3404 (m), 3140 (w), 1657 (m), 1598 (m), 1546 (m), 1400 (s), 1178 (w), 1104 (w), 1053 (w), 1009 (w), 854 (w), 774 (m), 501 (w).

## 2.2 Synthesis of **2**.

First, a solution of 2,6-naphthalene dicarboxylic acid, also known as  $\text{H}_2\text{NDC}$  linker (95%, 0.26 g, 0.83 mmol) in N, N-dimethylformamide (DMF, 30 mL) was mixed with nonahydrate aluminum nitrate  $\text{Al}(\text{NO}_3)_3 \cdot 9\text{H}_2\text{O}$  (98%, 0.52 g, 1.40 mmol) in a Teflon Liner. Then, the liner was placed into an autoclave at 120 °C for 24 h. After that, the autoclave was opened at room temperature, and the product was washed with 20 mL of DMF and centrifuged for 2.5 min at 10000 rpm three times. Finally, the product was dried for 4 h at 120 °C in an oven. Yield: 0.43 g (90.5%) for **2**.  $[\text{Al}(\text{OH})(\text{C}_{12}\text{O}_4\text{H}_6)(\text{DMF})_{1.3}](\text{H}_2\text{O})_{1.4}$ : calc (%): C, 47.85; H, 5.37; N, 4.73, found (%): C, 47.80; H, 5.41; N, 4.69. FT-IR (4000-400  $\text{cm}^{-1}$ ): 3534 (m), 3110 (w), 1631 (m), 1549 (m), 1541 (m), 1407 (s), 1159 (w), 1112 (w), 1067 (w), 1015 (w), 874 (w), 770 (m), 515 (w).

## 2.3 Synthesis of **3**.

In a typical procedure,  $\text{Al}(\text{NO}_3)_3 \cdot 9\text{H}_2\text{O}$  (0.34 g, 0.906 mmol), biphenyl-3,3',5,5'-tetracarboxylic acid (0.06 g, 0.182 mmol) and piperazine (0.10 g, 1.26 mmol) were mixed and dispersed in ultrapure water (10 mL), then  $\text{HNO}_3$  (2.8 M, 2 mL) was added to the resulting mixture. After stirring for 30 min, the milky slurry was transferred into a 25 mL lining of polytetrafluoroethylene reactor, which was sealed in the autoclave and heated to 210 °C for 72 h. After cooling overnight to room temperature, the resultant white microcrystalline product was separated by filtration, washed several times with water and dried overnight in an oven at 60 °C. The as-prepared solid sample was activated in two steps: the initial product was first immersed in nitric acid solution for 24 h to remove unreacted species; in the second step, ethanol was used to exchange guest molecules in pores of **3**, by sealing in an autoclave and heating at 100 °C for 20 h. The resultant white solid product was separated by filtration, washed several times

with ethanol and dried overnight in an oven at 60 °C.  $[\text{Al}(\text{OH})(\text{C}_{16}\text{O}_8\text{H}_6)_{0.5}](\text{H}_2\text{O})_7$ : calc (%): C, 35.37; H, 3.39; N, 0.00, found (%): C, 35.34; H, 3.44; N, 0.00.

## 2.4 Synthesis of Im@1-3.

The activated samples of **1-3** were immersed in 1.0 M methanol solution of imidazole for 72 h, respectively. The crystals are then dried under vacuum oven at 70 °C to obtain the imidazole-supported products Im@1-3.

## 3. Proton Conduction Measurement.

The alternating-current (AC) impedance plots were recorded on a CHI660E impedance analyzer (AC voltage = 100 mV; frequency = 1-10<sup>6</sup> Hz) with a quad four-probe electrochemical cell. The microcrystalline powder of relevant MOFs (80-100 mg) was pressed under the pressure of 2.5~3.0 MPa, and the cuboid sample was obtained. See Figure S13, the size of the sample was 1.01 cm × 0.42 cm × 0.26 cm measured by vernier caliper. Different RHs (45-100%) and temperatures (20-80 °C) were applied.

The impedance spectra were recorded under different relative humidity and temperature, wherein the relative humidity (RH) was controlled using the standard saturated aqueous solutions of certain salts. The relative humidity inside the chamber was controlled by standard saturated aqueous solutions of pure water, NaSO<sub>4</sub>, KCl, NaCl, NaBr, and K<sub>2</sub>CO<sub>3</sub> (corresponding RH are about 100, 93, 86, 75, 60, and 45%, respectively). Consequently, both sides of the plate were attached to silver wires with silver paste and then put in a sealed double walled glass chamber and connected to the electrochemical workstation. The proton conductivities of the plate were then tested by a quasi-four-probe method in the chamber connected with a temperature-controlled circulation water bath. The cuboid sample was fully hydrated in the corresponding humidity for 16 h before the ac testing. All impedance data were obtained through the Power Suite program. The impedance measurements were carried out by using a CHI660E electrochemical workstation with tuned frequencies from 1.0 Hz to 4.0 MHz and alternating potentials of 100 mV. We used Zview software to fit the impedance values to obtain the equivalent circuits of the two composites to calculate the resistance.

Conductivity was deduced from the Bode diagram as well as from the Nyquist plot for comparison using the equation:

$$\sigma = \frac{L}{RS} \dots\dots\dots (\text{eq S1})$$

where  $L$  (cm) is the length of the block,  $R$  ( $\Omega$ ) is the impedance, and  $S$  ( $\text{cm}^2$ ) is the face area of the plate ( $S = \text{thickness} \times \text{width}$ ). All measurements were repeated three times to get reproducible results. The activation energy ( $E_a$ ) was calculated by the equation (2) in previous literature.

$$\sigma T = \sigma_0 \exp\left(\frac{-E_a}{k_B T}\right) \dots\dots\dots (\text{eq S2})$$

where  $\sigma$  is the proton conductivity,  $\sigma_0$  is the preexponential factor,  $k_B$  is the Boltzmann constant, and  $T$  is the temperature (K).  $E_a$  is the activation energy (eV).

#### 4. The Grand Canonical Monte Carlo Simulations.

The Grand Canonical Monte Carlo (GCMC) simulations were performed for  $\text{H}_2\text{O}$  and imidazole adsorption on **1-3**. The MOF skeletons were both treated as rigid bodies. The beneficial adsorption sites were simulated by the fixed loading task and Metropolis method at 298 K and 100 kPa. The loading steps, equilibration steps and the production steps were all set to  $2.0 \times 10^7$ . The saturation/maximum uptakes were modeled at 298 K using the fixed pressure task and Metropolis method with  $2.0 \times 10^7$  equilibration steps, followed by  $2.0 \times 10^7$  production steps for calculating the ensemble averages. The dispersive and steric repulsive interactions of each atom in **1-3** frameworks and water molecules were both modeled by the dreiding force field (Dreiding) or universal force field (UFF). The atomic partial charges of the framework were used for  $Q_{\text{eq}}$  method, the guest gas molecules were optimized using the DMol3 method and adopted the B3LYP fitted charge. The interaction between the guest water, imidazole molecule and the MOF structure is described by the Lennard-Jones (LJ) contribution and the cut-off radius used for the Lennard-Jones interactions is 12.8 Å. All the simulations were carried out by using sorption module in the Material Studio software.

## 5. AC Impedance Analysis.

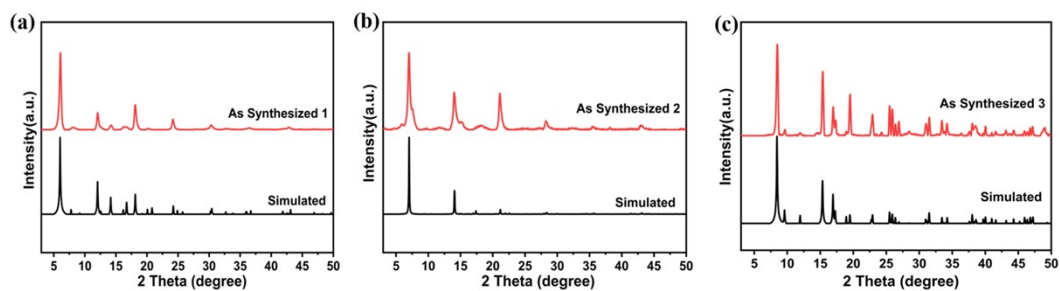

**Figure S1.** Powder X-ray diffraction patterns of MOFs: (a) **1**, (b) **2**, (c) **3**.

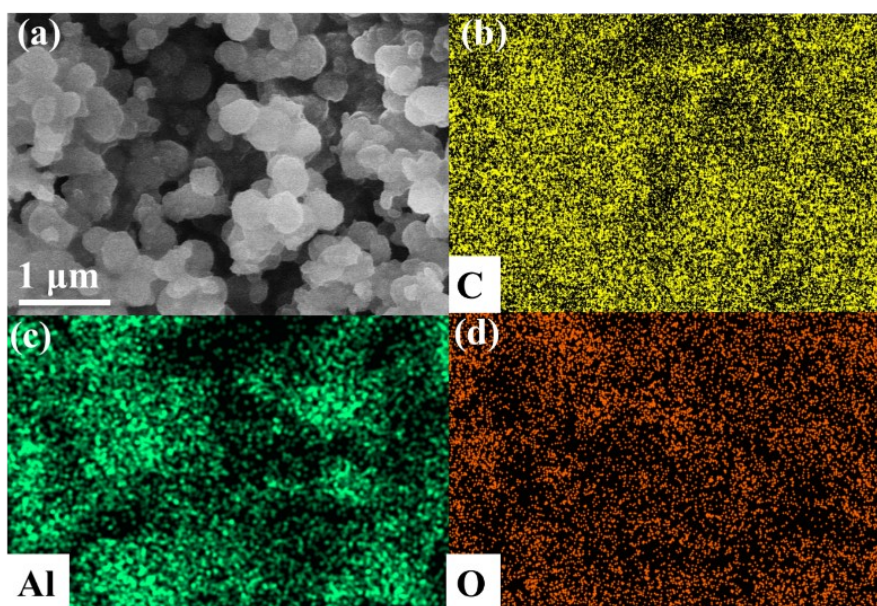

**Figure S2.** SEM image and energy-dispersive elemental mapping images of MOF **1**.

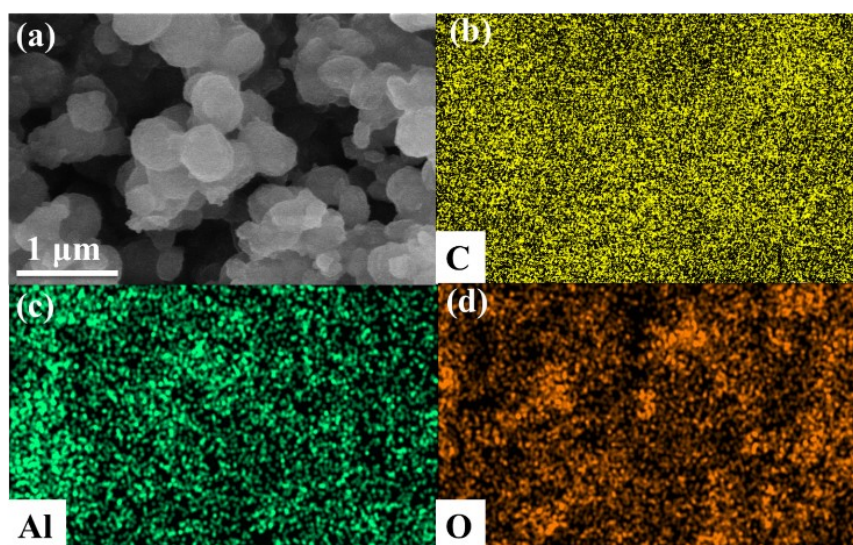

**Figure S3.** SEM image and energy-dispersive elemental mapping images of MOF **2**.

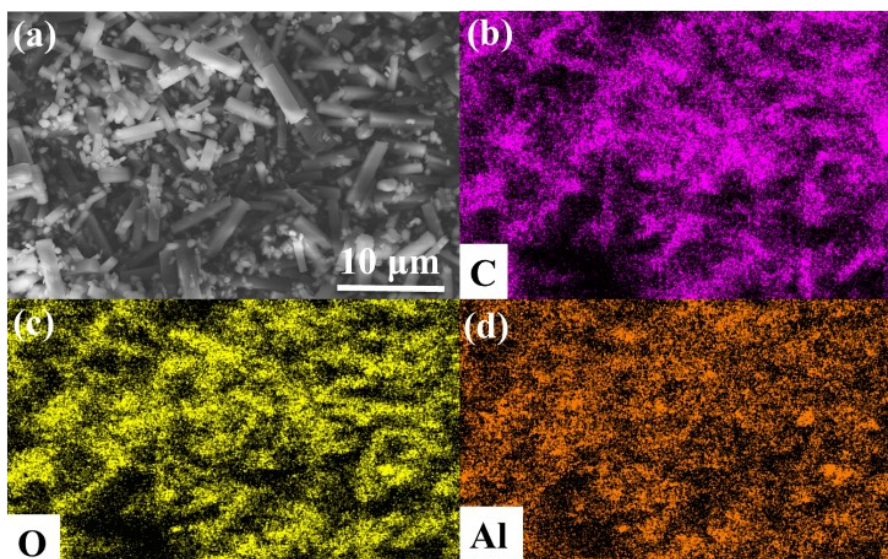

**Figure S4.** SEM image and energy-dispersive elemental mapping images of MOF **3**.

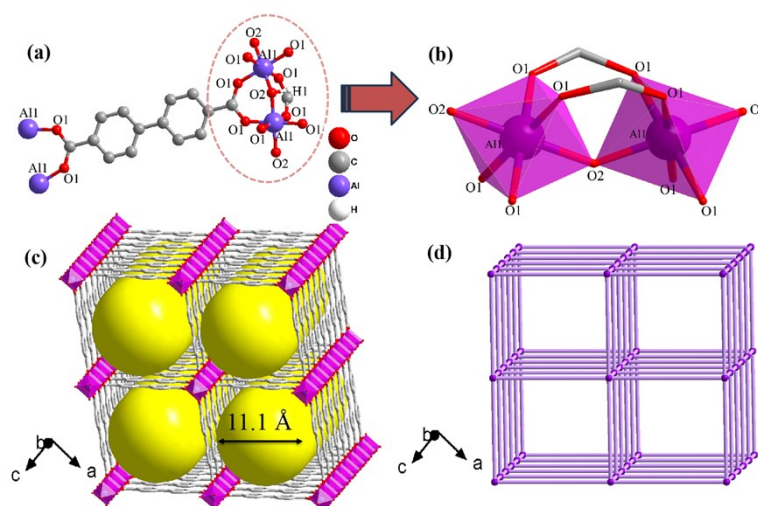

**Figure S5.** (a) Simplified coordination environments of **1**  $[\text{Al}(\text{OH})(\text{C}_{14}\text{O}_4\text{H}_8)(\text{DMF})_{1.8}](\text{H}_2\text{O})_{3.6}$ . (b) Coordination environment of a binuclear  $\text{Al}_2$  SBU. Color code: C, gray; O, red; Al, purple; H, white. The H atoms are omitted. (c) The one-dimensional channel structure of the three-dimensional framework is observed from the  $b$  axis. (d) The simplified topology structure of **1**.



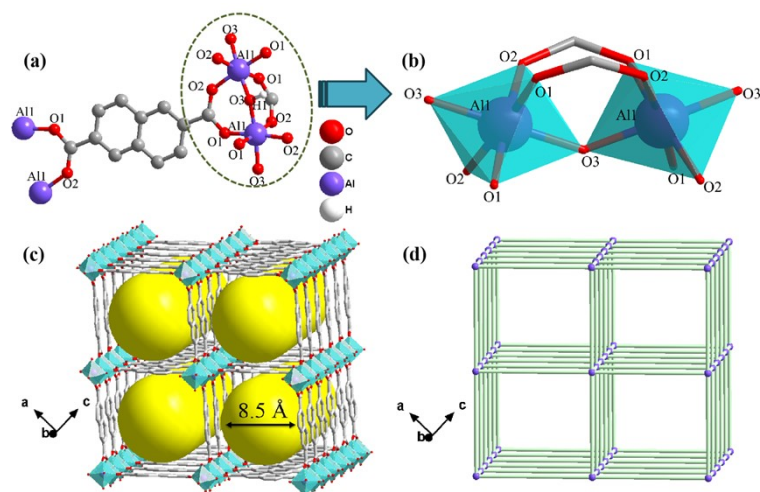

**Figure S6.** (a) Simplified coordination environments of **2**  $[\text{Al}(\text{OH})(\text{C}_{12}\text{O}_4\text{H}_6)(\text{DMF})_{1.3}(\text{H}_2\text{O})_{1.4}]$ . (b) Coordination environment of a binuclear  $\text{Al}_2$  SBU. Color code: C, gray; O, red; Al, purple; H, white. The H atoms are omitted. (c) The one-dimensional channel structure of the three-dimensional framework is observed from the  $b$  axis. (d) The simplified topology structure of **2**.

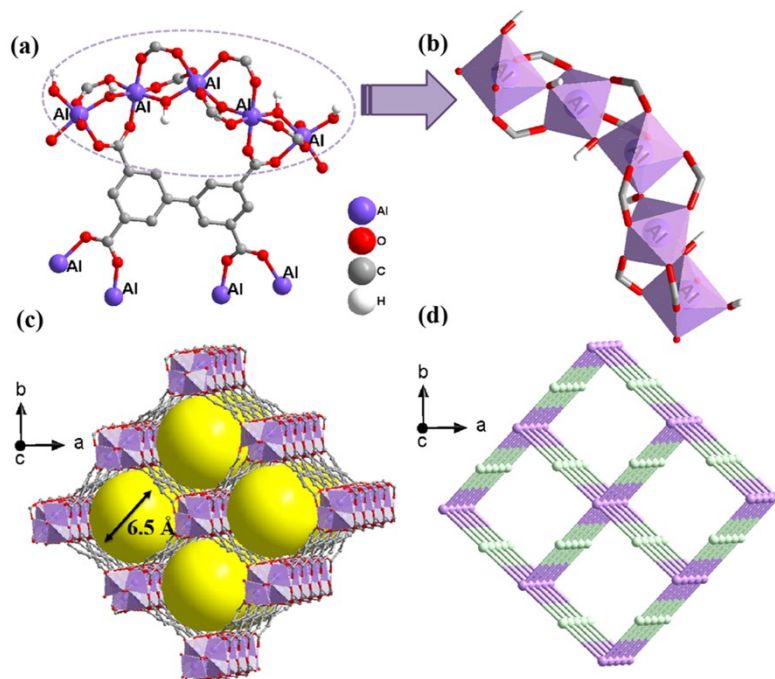

**Figure S7.** (a) Simplified coordination environments of **3**  $[\text{Al}(\text{OH})(\text{C}_{16}\text{O}_8\text{H}_6)_{0.5}](\text{H}_2\text{O})_7$ . (b) Coordinated environment of aluminum metal clusters. Color code: C, gray; O, red; Al, purple; H, white. The H atoms are omitted. (c) The one-dimensional channel structure of the three-dimensional framework is observed from the  $c$  axis. (d) The simplified topology structure of **3**.

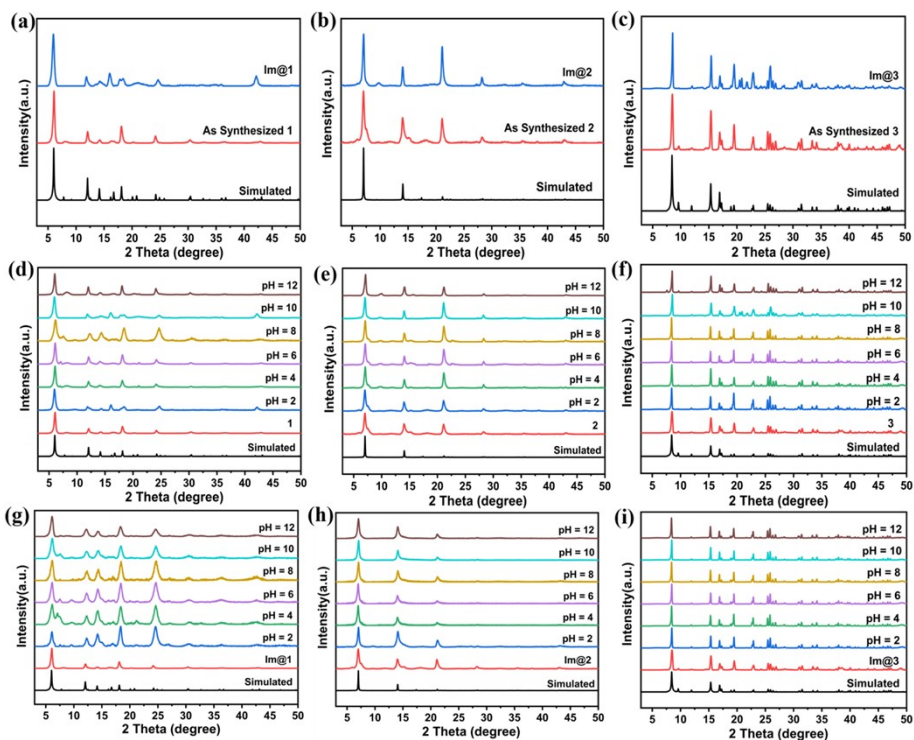

**Figure S8.** PXRD patterns of simulated, synthesis **1-3** and Im@**1-3** (a)-(c). PXRD patterns of **1-3** (d)-(f), and Im@**1-3** (g)-(i) at immersed in aqueous solutions of different pH values for 24 h.

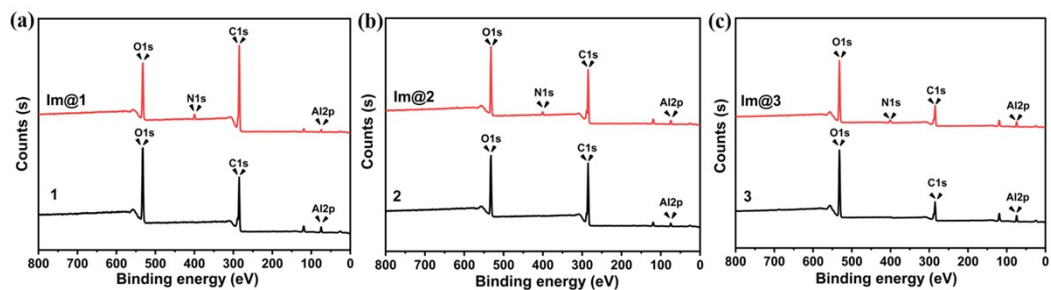

**Figure S9.** (a) XPS spectra of **1** and Im@**1** (a); **2** and Im@**2** (b); **3** and Im@**3** (c).

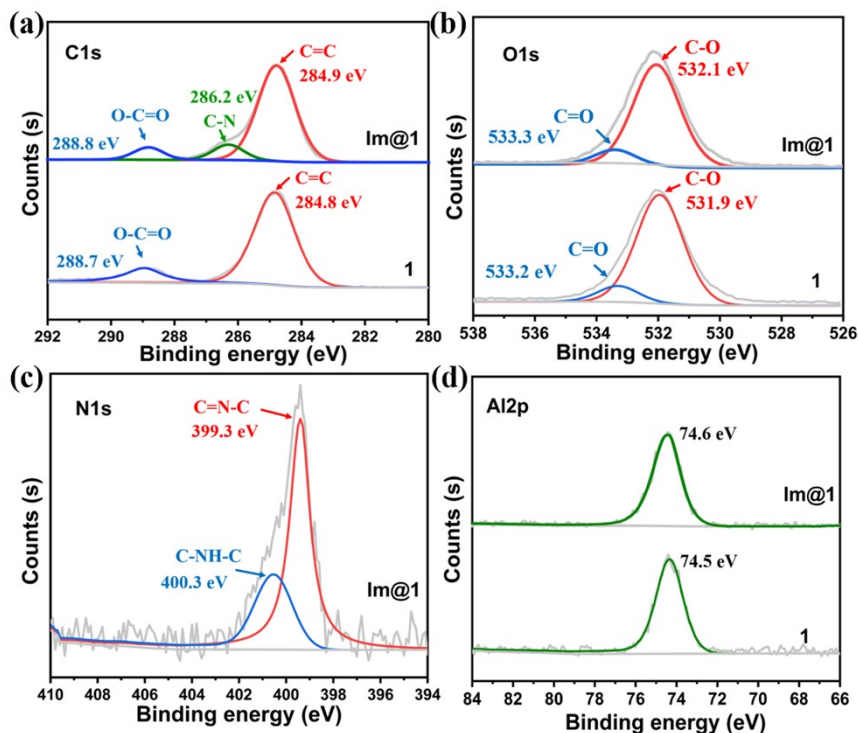

**Figure S10.** XPS spectra of (a) C1s, (b) O1s, (c) N1s, and (d) Al2p in **1** and **Im@1**.

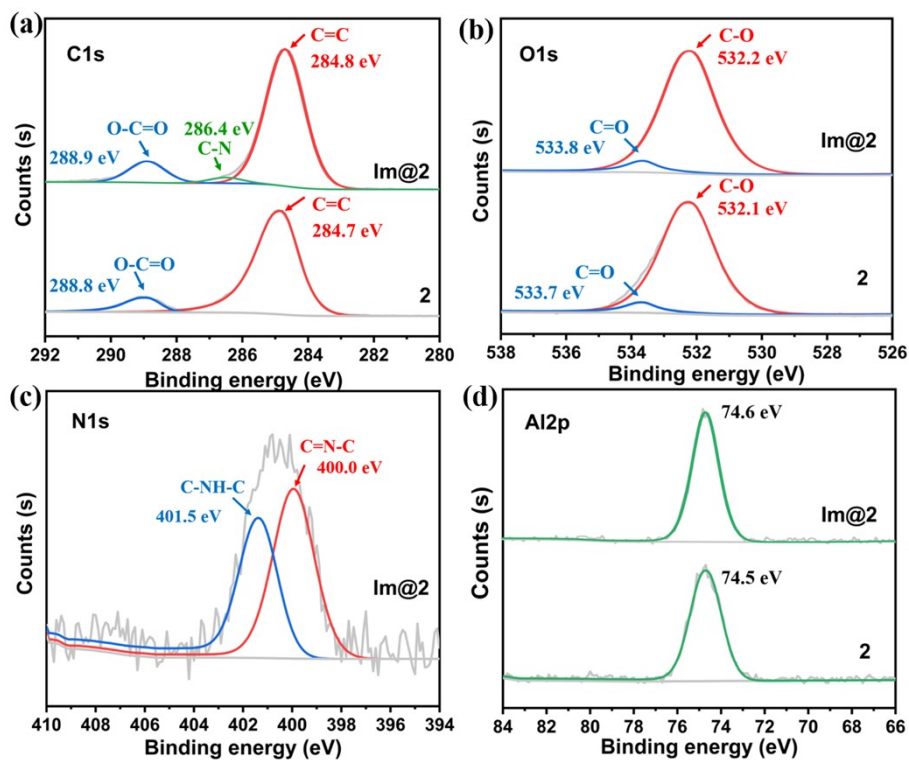

**Figure S11.** XPS spectra of (a) C1s, (b) O1s, (c) N1s, and (d) Al2p in **2** and **Im@2**.

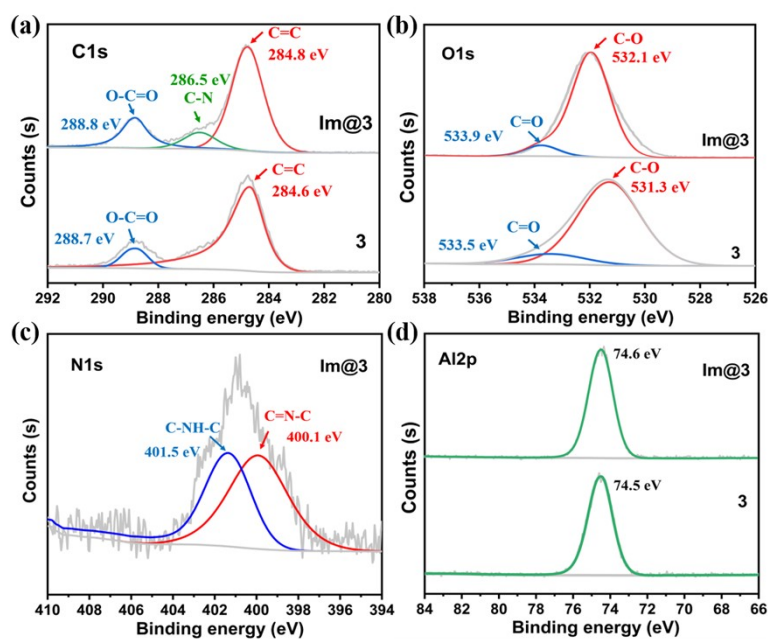

**Figure S12.** XPS spectra of (a) C1s, (b) O1s, (c) N1s, and (d) Al2p in **3** and Im@**3**.

**Table S1.** The binding energy (eV) of the characteristic peaks (C1s, O1s, N1s, and Al2p) of the XPS spectra in **1-3** and Im@**1-3**

| Orbital of Elements | Functional groups | 1     | Im@1  | 2     | Im@2  | 3     | Im@3  |
|---------------------|-------------------|-------|-------|-------|-------|-------|-------|
| C1s                 | O-C=O             | 288.7 | 288.8 | 288.8 | 288.9 | 288.7 | 288.8 |
|                     | C=C               | 284.8 | 284.9 | 284.7 | 284.8 | 284.6 | 284.8 |
|                     | C-N               | -     | 286.2 | -     | 286.4 | -     | 286.5 |
| O1s                 | C-O               | 531.9 | 532.1 | 532.1 | 532.2 | 531.3 | 532.1 |
|                     | C=O               | 533.2 | 533.3 | 533.7 | 533.8 | 533.5 | 533.9 |
| N1s                 | C-NH-C            | -     | 400.3 | -     | 401.5 | -     | 401.5 |
|                     | C=N-C             | -     | 399.3 | -     | 400.0 | -     | 400.1 |
| Al2p                | -                 | 74.5  | 74.6  | 74.5  | 74.6  | 74.5  | 74.6  |

**Table S2.** The Langmuir surface areas, pore volumes and pore sizes of **1-3** and Im@**1-3** are correlated

| Samples | Langmuir Surface Area (m <sup>2</sup> g <sup>-1</sup> ) | Pore Volume (cm <sup>3</sup> g <sup>-1</sup> ) | Pore Size (Å) |
|---------|---------------------------------------------------------|------------------------------------------------|---------------|
| 1       | 2335                                                    | 0.81                                           | 11.7          |
| 2       | 1996                                                    | 0.68                                           | 8.9           |
| 3       | 1130                                                    | 0.43                                           | 6.8           |
| Im@1    | 813                                                     | 0.47                                           | 9.5           |
| Im@2    | 548                                                     | 0.31                                           | 7.3           |
| Im@3    | 131                                                     | 0.26                                           | 5.6           |

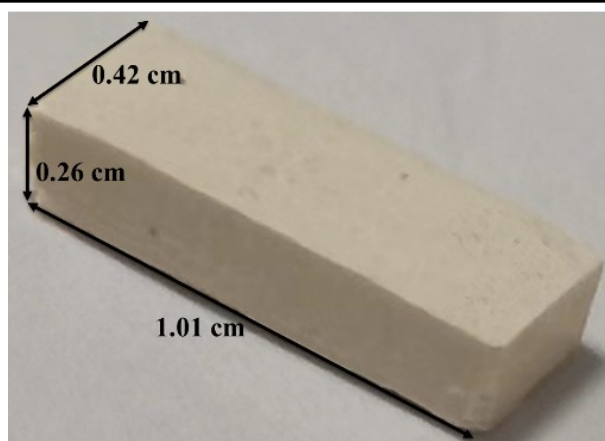

**Figure S13.** The photograph of the cuboid plate sample of Im@3. (Here, the cuboid plate takes Im@3 as an example)

**Table S3.** Proton Conductivities (S cm<sup>-1</sup>) of **1** at Different RHs and Temperatures

| Temp (°C) | 45% RH                 | 60% RH                | 75% RH                | 85% RH                | 93% RH                | 100% RH               |
|-----------|------------------------|-----------------------|-----------------------|-----------------------|-----------------------|-----------------------|
| 20        | 2.63×10 <sup>-10</sup> | 7.49×10 <sup>-7</sup> | 9.71×10 <sup>-6</sup> | 4.12×10 <sup>-5</sup> | 9.09×10 <sup>-5</sup> | 2.78×10 <sup>-3</sup> |
| 30        | 5.71×10 <sup>-10</sup> | 1.34×10 <sup>-6</sup> | 2.41×10 <sup>-5</sup> | 7.23×10 <sup>-5</sup> | 1.53×10 <sup>-4</sup> | 3.40×10 <sup>-3</sup> |
| 40        | 1.36×10 <sup>-9</sup>  | 2.50×10 <sup>-6</sup> | 5.38×10 <sup>-5</sup> | 1.23×10 <sup>-4</sup> | 2.82×10 <sup>-4</sup> | 4.91×10 <sup>-3</sup> |
| 50        | 2.47×10 <sup>-9</sup>  | 5.15×10 <sup>-6</sup> | 1.10×10 <sup>-4</sup> | 1.97×10 <sup>-4</sup> | 3.89×10 <sup>-4</sup> | 6.17×10 <sup>-3</sup> |
| 60        | 5.41×10 <sup>-9</sup>  | 7.92×10 <sup>-6</sup> | 1.78×10 <sup>-4</sup> | 3.12×10 <sup>-4</sup> | 5.99×10 <sup>-4</sup> | 8.53×10 <sup>-3</sup> |
| 70        | 1.15×10 <sup>-8</sup>  | 1.25×10 <sup>-5</sup> | 2.99×10 <sup>-4</sup> | 5.51×10 <sup>-4</sup> | 1.02×10 <sup>-3</sup> | 1.12×10 <sup>-2</sup> |
| 80        | 2.12×10 <sup>-8</sup>  | 2.27×10 <sup>-5</sup> | 5.23×10 <sup>-4</sup> | 8.46×10 <sup>-4</sup> | 1.65×10 <sup>-3</sup> | 1.39×10 <sup>-2</sup> |

**Table S4.** Proton Conductivities (S cm<sup>-1</sup>) of **2** at Different RHs and Temperatures

| Temp (°C) | 45% RH                | 60% RH                | 75% RH                | 85% RH                | 93% RH                | 100% RH               |
|-----------|-----------------------|-----------------------|-----------------------|-----------------------|-----------------------|-----------------------|
| 20        | 1.92×10 <sup>-9</sup> | 7.02×10 <sup>-6</sup> | 4.07×10 <sup>-5</sup> | 2.48×10 <sup>-4</sup> | 2.65×10 <sup>-4</sup> | 8.38×10 <sup>-3</sup> |

|           |                       |                       |                       |                       |                       |                       |
|-----------|-----------------------|-----------------------|-----------------------|-----------------------|-----------------------|-----------------------|
| <b>30</b> | $3.34 \times 10^{-9}$ | $1.09 \times 10^{-6}$ | $4.69 \times 10^{-5}$ | $3.34 \times 10^{-4}$ | $4.79 \times 10^{-4}$ | $1.10 \times 10^{-2}$ |
| <b>40</b> | $5.30 \times 10^{-9}$ | $1.69 \times 10^{-5}$ | $5.95 \times 10^{-5}$ | $4.50 \times 10^{-4}$ | $8.55 \times 10^{-4}$ | $1.28 \times 10^{-2}$ |
| <b>50</b> | $8.54 \times 10^{-9}$ | $2.88 \times 10^{-5}$ | $7.33 \times 10^{-5}$ | $5.92 \times 10^{-4}$ | $1.44 \times 10^{-3}$ | $1.74 \times 10^{-2}$ |
| <b>60</b> | $1.47 \times 10^{-8}$ | $3.81 \times 10^{-5}$ | $8.80 \times 10^{-5}$ | $7.64 \times 10^{-4}$ | $2.03 \times 10^{-3}$ | $1.98 \times 10^{-2}$ |
| <b>70</b> | $2.84 \times 10^{-8}$ | $6.26 \times 10^{-5}$ | $1.21 \times 10^{-4}$ | $1.01 \times 10^{-3}$ | $3.11 \times 10^{-3}$ | $2.48 \times 10^{-2}$ |
| <b>80</b> | $4.34 \times 10^{-8}$ | $8.90 \times 10^{-5}$ | $1.51 \times 10^{-4}$ | $1.27 \times 10^{-3}$ | $5.12 \times 10^{-3}$ | $2.98 \times 10^{-2}$ |

**Table S5.** Proton Conductivities (S cm<sup>-1</sup>) of **3** at Different RHs and Temperatures

| <b>Temp (°C)</b> | <b>45% RH</b>         | <b>60% RH</b>         | <b>75% RH</b>         | <b>85% RH</b>         | <b>93% RH</b>         | <b>100% RH</b>        |
|------------------|-----------------------|-----------------------|-----------------------|-----------------------|-----------------------|-----------------------|
| <b>20</b>        | $1.16 \times 10^{-7}$ | $9.05 \times 10^{-5}$ | $1.40 \times 10^{-4}$ | $4.53 \times 10^{-4}$ | $1.22 \times 10^{-3}$ | $1.94 \times 10^{-2}$ |
| <b>30</b>        | $2.31 \times 10^{-7}$ | $1.42 \times 10^{-4}$ | $2.02 \times 10^{-4}$ | $6.04 \times 10^{-4}$ | $1.65 \times 10^{-3}$ | $2.32 \times 10^{-2}$ |
| <b>40</b>        | $5.37 \times 10^{-7}$ | $2.16 \times 10^{-4}$ | $3.28 \times 10^{-4}$ | $7.09 \times 10^{-4}$ | $2.17 \times 10^{-3}$ | $2.71 \times 10^{-2}$ |
| <b>50</b>        | $2.15 \times 10^{-6}$ | $3.30 \times 10^{-4}$ | $4.65 \times 10^{-4}$ | $9.06 \times 10^{-4}$ | $2.77 \times 10^{-3}$ | $3.40 \times 10^{-2}$ |
| <b>60</b>        | $3.07 \times 10^{-6}$ | $4.59 \times 10^{-4}$ | $6.71 \times 10^{-4}$ | $1.25 \times 10^{-3}$ | $3.87 \times 10^{-3}$ | $4.00 \times 10^{-2}$ |
| <b>70</b>        | $4.70 \times 10^{-6}$ | $6.60 \times 10^{-4}$ | $8.80 \times 10^{-4}$ | $1.67 \times 10^{-3}$ | $5.27 \times 10^{-3}$ | $4.73 \times 10^{-2}$ |
| <b>80</b>        | $8.84 \times 10^{-6}$ | $9.78 \times 10^{-4}$ | $1.36 \times 10^{-3}$ | $2.38 \times 10^{-3}$ | $7.37 \times 10^{-3}$ | $5.57 \times 10^{-2}$ |

**Table S6.** Proton Conductivities (S cm<sup>-1</sup>) of Im@**1** at Different RHs and Temperatures

| <b>Temp (°C)</b> | <b>45% RH</b>         | <b>60% RH</b>         | <b>75% RH</b>         | <b>85% RH</b>         | <b>93% RH</b>         | <b>100% RH</b>        |
|------------------|-----------------------|-----------------------|-----------------------|-----------------------|-----------------------|-----------------------|
| <b>20</b>        | $7.58 \times 10^{-7}$ | $1.13 \times 10^{-4}$ | $1.43 \times 10^{-4}$ | $9.41 \times 10^{-4}$ | $2.29 \times 10^{-3}$ | $8.91 \times 10^{-3}$ |
| <b>30</b>        | $2.18 \times 10^{-6}$ | $1.79 \times 10^{-4}$ | $2.82 \times 10^{-4}$ | $1.41 \times 10^{-3}$ | $3.07 \times 10^{-3}$ | $1.25 \times 10^{-2}$ |
| <b>40</b>        | $3.62 \times 10^{-6}$ | $2.93 \times 10^{-4}$ | $4.98 \times 10^{-4}$ | $2.41 \times 10^{-3}$ | $4.75 \times 10^{-3}$ | $1.47 \times 10^{-2}$ |
| <b>50</b>        | $6.05 \times 10^{-6}$ | $3.98 \times 10^{-4}$ | $9.31 \times 10^{-4}$ | $3.65 \times 10^{-3}$ | $6.76 \times 10^{-3}$ | $1.83 \times 10^{-2}$ |
| <b>60</b>        | $1.00 \times 10^{-5}$ | $5.61 \times 10^{-4}$ | $1.25 \times 10^{-3}$ | $5.72 \times 10^{-3}$ | $1.00 \times 10^{-3}$ | $2.28 \times 10^{-2}$ |
| <b>70</b>        | $1.51 \times 10^{-5}$ | $9.08 \times 10^{-4}$ | $2.37 \times 10^{-3}$ | $9.48 \times 10^{-3}$ | $1.36 \times 10^{-3}$ | $3.13 \times 10^{-2}$ |
| <b>80</b>        | $3.07 \times 10^{-5}$ | $1.43 \times 10^{-3}$ | $3.78 \times 10^{-3}$ | $1.50 \times 10^{-2}$ | $2.24 \times 10^{-3}$ | $4.00 \times 10^{-2}$ |

**Table S7.** Proton Conductivities (S cm<sup>-1</sup>) of Im@**2** at Different RHs and Temperatures

| <b>Temp (°C)</b> | <b>45% RH</b>         | <b>60% RH</b>         | <b>75% RH</b>         | <b>85% RH</b>         | <b>93% RH</b>         | <b>100% RH</b>        |
|------------------|-----------------------|-----------------------|-----------------------|-----------------------|-----------------------|-----------------------|
| <b>20</b>        | $3.48 \times 10^{-6}$ | $7.46 \times 10^{-5}$ | $7.66 \times 10^{-4}$ | $5.37 \times 10^{-3}$ | $7.02 \times 10^{-3}$ | $3.06 \times 10^{-2}$ |
| <b>30</b>        | $6.01 \times 10^{-6}$ | $1.06 \times 10^{-4}$ | $1.04 \times 10^{-3}$ | $6.95 \times 10^{-3}$ | $9.50 \times 10^{-3}$ | $3.58 \times 10^{-2}$ |
| <b>40</b>        | $1.15 \times 10^{-5}$ | $1.58 \times 10^{-4}$ | $1.39 \times 10^{-3}$ | $8.59 \times 10^{-3}$ | $1.23 \times 10^{-2}$ | $4.06 \times 10^{-2}$ |

|           |                       |                       |                       |                       |                       |                       |
|-----------|-----------------------|-----------------------|-----------------------|-----------------------|-----------------------|-----------------------|
| <b>50</b> | $1.61 \times 10^{-5}$ | $2.42 \times 10^{-4}$ | $1.74 \times 10^{-3}$ | $1.04 \times 10^{-2}$ | $1.66 \times 10^{-2}$ | $4.65 \times 10^{-2}$ |
| <b>60</b> | $2.49 \times 10^{-5}$ | $3.22 \times 10^{-4}$ | $2.47 \times 10^{-3}$ | $1.23 \times 10^{-2}$ | $2.08 \times 10^{-2}$ | $5.64 \times 10^{-2}$ |
| <b>70</b> | $4.43 \times 10^{-5}$ | $4.12 \times 10^{-4}$ | $3.07 \times 10^{-3}$ | $1.84 \times 10^{-2}$ | $2.98 \times 10^{-2}$ | $6.33 \times 10^{-2}$ |
| <b>80</b> | $7.64 \times 10^{-5}$ | $5.41 \times 10^{-4}$ | $4.55 \times 10^{-3}$ | $2.10 \times 10^{-2}$ | $3.77 \times 10^{-2}$ | $7.11 \times 10^{-2}$ |

**Table S8.** Proton Conductivities ( $\text{S cm}^{-1}$ ) of Im@**3** at Different RHs and Temperatures

| <b>Temp (°C)</b> | <b>45% RH</b>         | <b>60% RH</b>         | <b>75% RH</b>         | <b>85% RH</b>         | <b>93% RH</b>         | <b>100% RH</b>        |
|------------------|-----------------------|-----------------------|-----------------------|-----------------------|-----------------------|-----------------------|
| <b>20</b>        | $8.13 \times 10^{-5}$ | $3.14 \times 10^{-4}$ | $1.07 \times 10^{-3}$ | $7.38 \times 10^{-3}$ | $1.94 \times 10^{-2}$ | $9.29 \times 10^{-2}$ |
| <b>30</b>        | $1.04 \times 10^{-4}$ | $5.20 \times 10^{-4}$ | $1.48 \times 10^{-3}$ | $8.96 \times 10^{-3}$ | $2.32 \times 10^{-2}$ | $1.09 \times 10^{-1}$ |
| <b>40</b>        | $1.26 \times 10^{-4}$ | $7.01 \times 10^{-4}$ | $2.08 \times 10^{-3}$ | $1.22 \times 10^{-2}$ | $2.79 \times 10^{-2}$ | $1.25 \times 10^{-1}$ |
| <b>50</b>        | $1.89 \times 10^{-4}$ | $9.62 \times 10^{-4}$ | $2.72 \times 10^{-3}$ | $1.40 \times 10^{-2}$ | $3.26 \times 10^{-2}$ | $1.65 \times 10^{-1}$ |
| <b>60</b>        | $2.67 \times 10^{-4}$ | $1.68 \times 10^{-3}$ | $3.53 \times 10^{-3}$ | $1.96 \times 10^{-2}$ | $4.01 \times 10^{-2}$ | $1.91 \times 10^{-1}$ |
| <b>70</b>        | $3.74 \times 10^{-4}$ | $2.25 \times 10^{-3}$ | $4.84 \times 10^{-3}$ | $2.57 \times 10^{-2}$ | $4.59 \times 10^{-2}$ | $2.21 \times 10^{-1}$ |
| <b>80</b>        | $9.35 \times 10^{-4}$ | $2.64 \times 10^{-3}$ | $6.93 \times 10^{-3}$ | $2.90 \times 10^{-2}$ | $5.53 \times 10^{-2}$ | $2.55 \times 10^{-1}$ |

**Table S9.** Comparison of the  $\sigma$  Values and  $E_a$  of **1-3**, Im@**1-3** and Other High-Performing Proton Conducting Materials

| <b>Materials</b>                 | <b>Conductivity (<math>\text{S cm}^{-1}</math>)</b> | <b><math>E_a</math> (eV)</b> | <b>Condition</b>  | <b>References</b> |
|----------------------------------|-----------------------------------------------------|------------------------------|-------------------|-------------------|
| Im@MOF-808                       | $3.45 \times 10^{-2}$                               | 0.25                         | 65 °C, 99% RH     | 1                 |
| Im@(NENU-3)                      | $1.82 \times 10^{-2}$                               | 0.57                         | 70 °C, 90% RH     | 2                 |
| Im-Fe-MOF                        | $1.21 \times 10^{-2}$                               | 0.44                         | 60 °C, 98% RH     | 3                 |
| Im@Fe-MOF                        | $4.23 \times 10^{-3}$                               | 0.57                         | 60 °C, 98% RH     | 3                 |
| Im@UiO-67                        | $1.44 \times 10^{-3}$                               | 0.36                         | 120 °C, anhydrous | 4                 |
| Im@TPB-DMTP-COF                  | $4.37 \times 10^{-3}$                               | /                            | 130 °C, anhydrous | 5                 |
| Nafion                           | $5.00 \times 10^{-2}$                               | 0.22                         | 30 °C, 98% RH     | 6                 |
| PCMOF-3                          | $3.50 \times 10^{-5}$                               | 0.17                         | 25 °C, 98% RH     | 7                 |
| Fe(OH)(bdc-(COOH) <sub>2</sub> ) | $7.00 \times 10^{-4}$                               | 0.21                         | 80 °C, 95% RH     | 8                 |
| In-IA-2D-1                       | $3.40 \times 10^{-3}$                               | 0.61                         | 27 °C, 98% RH     | 9                 |
| In-IA-2D-2                       | $2.60 \times 10^{-5}$                               | 0.48                         | 90 °C, 98% RH     | 9                 |
| PCMOF-5                          | $2.51 \times 10^{-3}$                               | 0.16                         | 60 °C, 98% RH     | 10                |

|                                                 |                       |       |                |           |
|-------------------------------------------------|-----------------------|-------|----------------|-----------|
| PCMOF2½                                         | $2.10 \times 10^{-2}$ | 0.21  | 85 °C, 90% RH  | 11        |
| IM-UiO-66-AS                                    | $1.54 \times 10^{-1}$ | 0.20  | 80 °C, 98% RH  | 12        |
| ZIF-8                                           | $4.60 \times 10^{-4}$ | 1.14  | 94 °C, 98% RH  | 13        |
| PCMOF10                                         | $3.55 \times 10^{-2}$ | 0.4   | 70 °C, 95% RH  | 14        |
| UiO-66(SO <sub>3</sub> H) <sub>2</sub>          | $8.40 \times 10^{-2}$ | 0.32  | 80 °C, 90% RH  | 15        |
| UiO-66(Zr)-<br>(CO <sub>2</sub> H) <sub>2</sub> | $2.30 \times 10^{-3}$ | 0.17  | 90 °C, 95% RH  | 16        |
| VNU-15                                          | $2.90 \times 10^{-2}$ | 0.22  | 95 °C, 60% RH  | 17        |
| Fe-CAT-5                                        | $5.00 \times 10^{-2}$ | 0.24  | 25 °C, 98% RH  | 18        |
| MIP-202(Zr)                                     | $1.10 \times 10^{-2}$ | 0.22  | 90 °C, 95% RH  | 19        |
| MOF-801-Hf                                      | $3.90 \times 10^{-3}$ | 0.35  | 100 °C, 98% RH |           |
| Im@MOF-801-<br>Hf                               | $1.46 \times 10^{-2}$ | 0.53  | 100 °C, 98% RH | 20        |
| DUT-67(Zr)                                      | $2.98 \times 10^{-3}$ | 0.25  | 100 °C, 98% RH |           |
| DUT-67(Hf)                                      | $3.86 \times 10^{-3}$ | 0.27  | 50 °C, 98% RH  | 21        |
| MIL-163                                         | $2.10 \times 10^{-3}$ | 0.25  | 90 °C, 95% RH  | 22        |
| Hf-UiO-66-NH <sub>2</sub>                       | $1.10 \times 10^{-3}$ | 0.52  | 100 °C, 98% RH |           |
| Hf-UiO-66-(OH) <sub>2</sub>                     | $4.22 \times 10^{-3}$ | 0.27  | 100 °C, 98% RH |           |
| Hf-UiO-66                                       | $1.79 \times 10^{-3}$ | 0.47  | 100 °C, 98% RH |           |
| Im@Hf-UiO-66-<br>NH <sub>2</sub>                | $1.32 \times 10^{-2}$ | 0.16  | 100 °C, 98% RH | 23        |
| Im@Hf-UiO-66-<br>(OH) <sub>2</sub>              | $1.32 \times 10^{-2}$ | 0.36  | 100 °C, 98% RH |           |
| Im@Hf-UiO-66                                    | $1.15 \times 10^{-2}$ | 0.40  | 100 °C, 98% RH |           |
| BUT-8(Cr)A                                      | $1.27 \times 10^{-1}$ | 0.11  | 80 °C, 100% RH |           |
| BUT-8(Cr)                                       | $4.63 \times 10^{-2}$ | 0.21  | 80 °C, 100% RH | 24        |
| Co-MOF-74                                       | $4.5 \times 10^{-3}$  | 0.12  | 90 °C, 95% RH  | 25        |
| <b>1</b>                                        | $1.39 \times 10^{-2}$ | 0.213 | 80 °C, 100% RH |           |
| Im@ <b>1</b>                                    | $4.00 \times 10^{-2}$ | 0.205 | 80 °C, 100% RH |           |
| <b>2</b>                                        | $2.98 \times 10^{-2}$ | 0.153 | 80 °C, 100% RH | This work |
| Im@ <b>2</b>                                    | $7.11 \times 10^{-2}$ | 0.104 | 80 °C, 100% RH |           |
| <b>3</b>                                        | $5.57 \times 10^{-2}$ | 0.121 | 80 °C, 100% RH |           |



Im@3

 $2.55 \times 10^{-1}$ 

0.101

80 °C, 100% RH

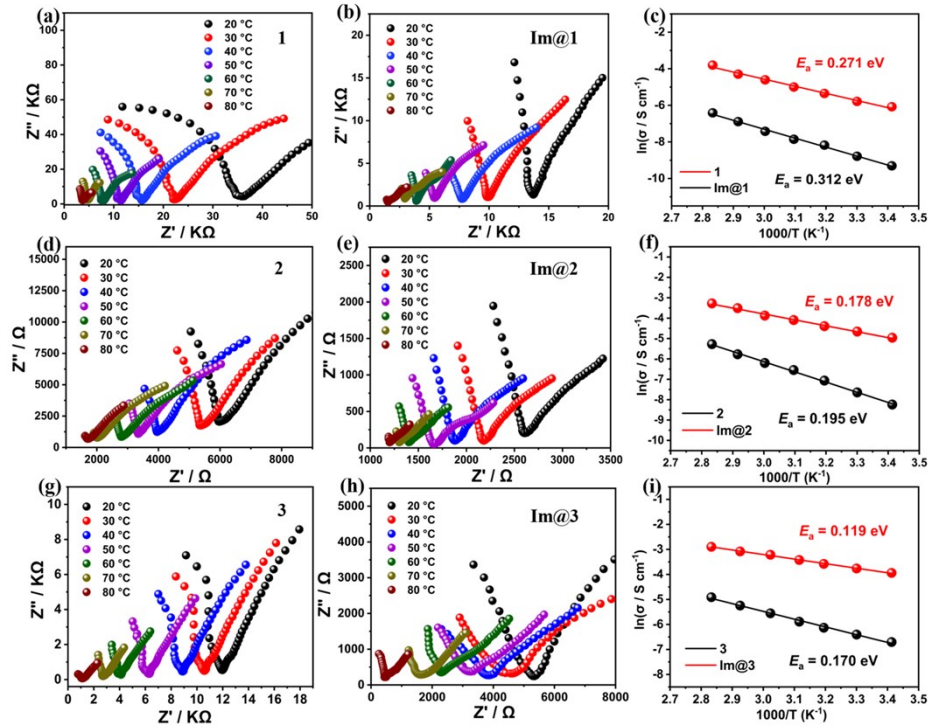

**Figure S14.** Impedance spectra of 1 (a) and Im@1 (b); 2 (d) and Im@2 (e); 3 (g) and Im@3 (h). Arrhenius plots of proton conductivities for 1 and Im@1 (c); 2 and Im@2 (f); 3 and Im@3 (i) under 93% RH condition with different temperatures.

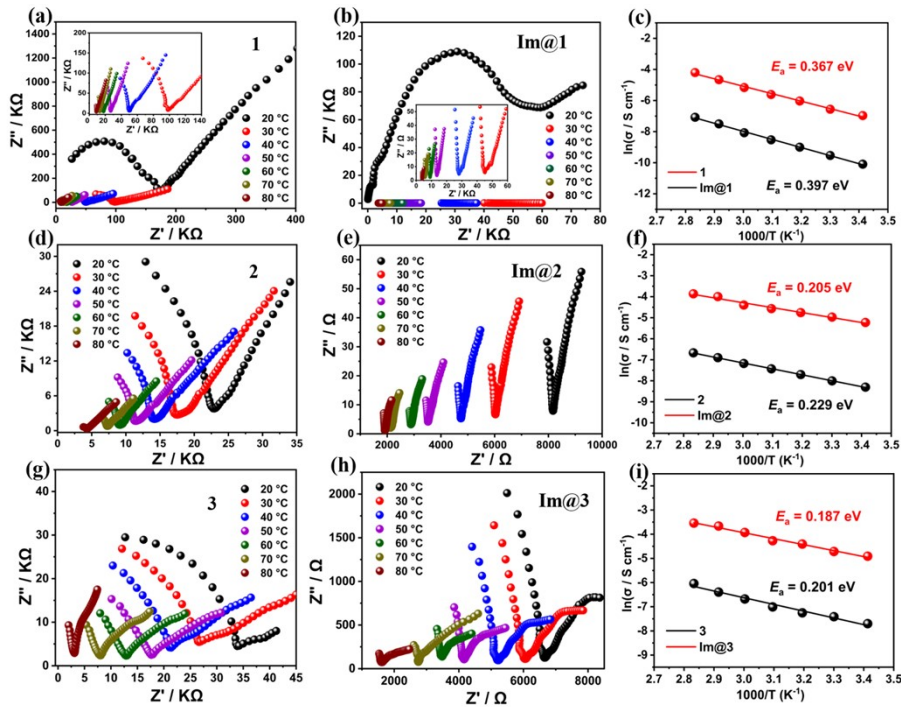

**Figure S15.** Impedance spectra of **1** (a) and Im@**1** (b); **2** (d) and Im@**2** (e); **3** (g) and Im@**3** (h). Arrhenius plots of proton conductivities for **1** and Im@**1** (c); **2** and Im@**2** (f); **3** and Im@**3** (i) under 86% RH condition with different temperatures.

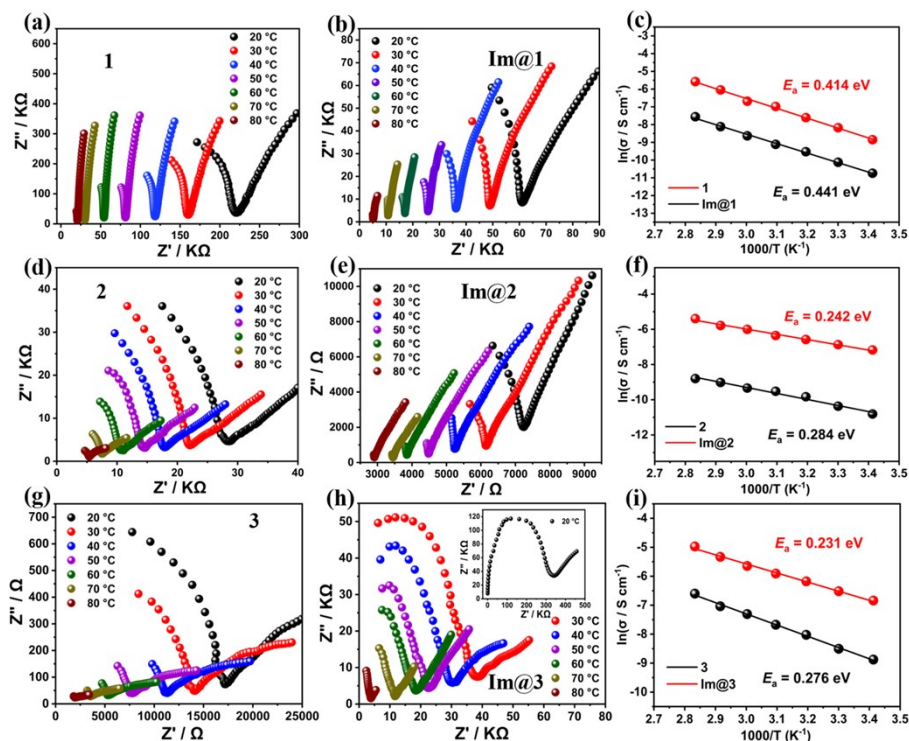

**Figure S16.** Impedance spectra of **1** (a) and Im@**1** (b); **2** (d) and Im@**2** (e); **3** (g) and Im@**3** (h). Arrhenius plots of proton conductivity for **1** and Im@**1** (c); **2** and Im@**2** (f); **3** and Im@**3** (i) under 75% RH condition with different temperatures.

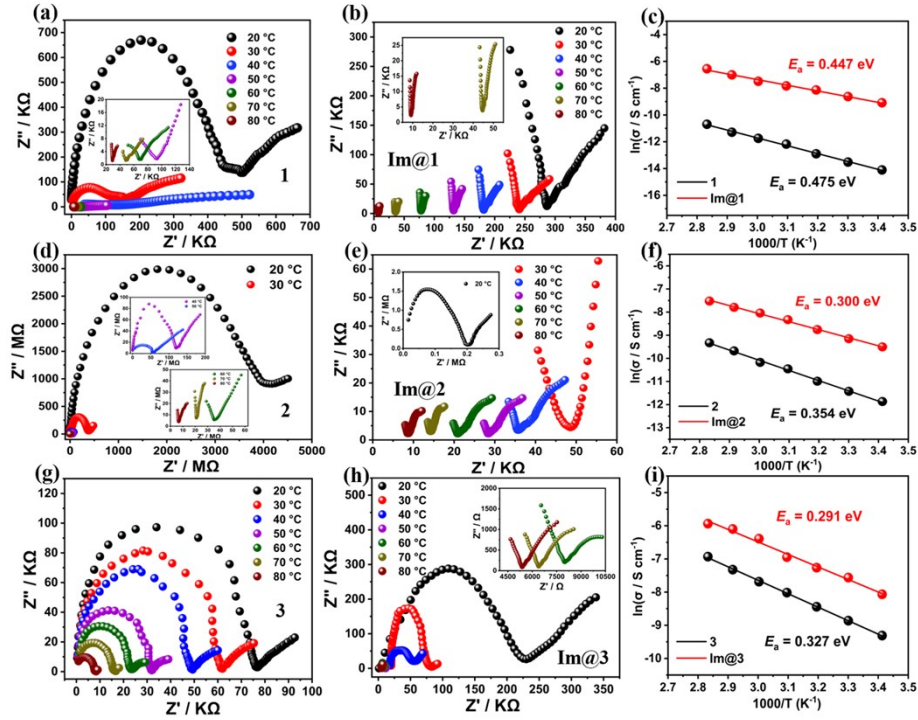

**Figure S17.** Impedance spectra of 1 (a) and Im@1 (b); 2 (d) and Im@2 (e); 3 (g) and Im@3 (h). Arrhenius plots of proton conductivities for 1 and Im@1 (c); 2 and Im@2 (f); 3 and Im@3 (i) under 60% RH condition with different temperatures.

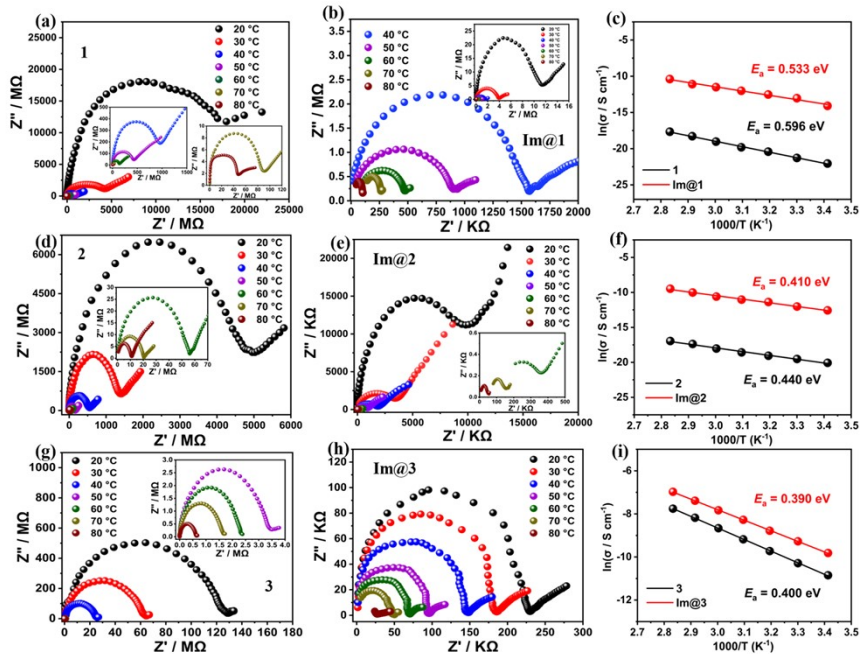

**Figure S18.** Impedance spectra of 1 (a) and Im@1 (b); 2 (d) and Im@2 (e); 3 (g) and Im@3 (h). Arrhenius plots of proton conductivities for 1 and Im@1 (c); 2 and Im@2 (f); 3 and Im@3 (i) under 45% RH condition with different temperatures.

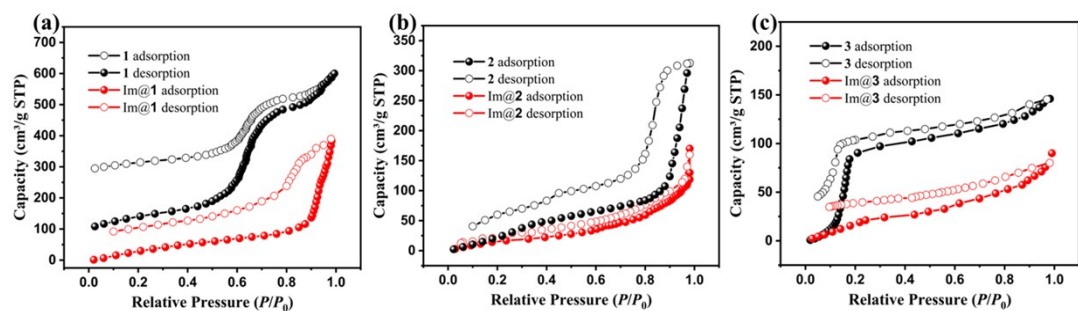

**Figure S19.** Water vapor adsorption-desorption isotherms of **1** and Im@**1** (a), **2** and Im@**2** (b), **3** and Im@**3** (c) at 298 K.

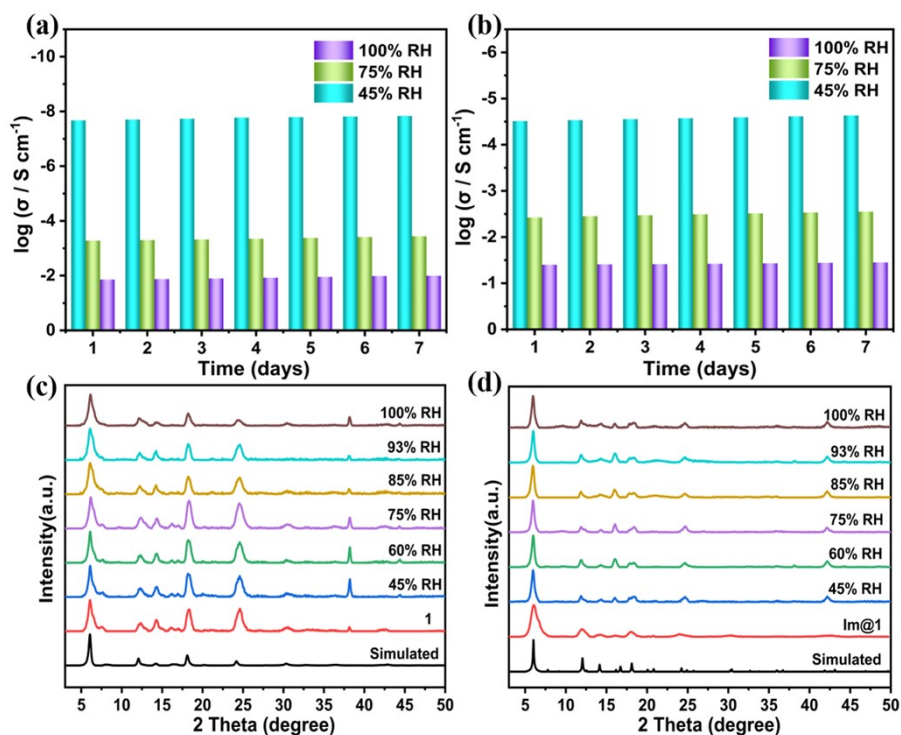

**Figure S20.** Proton conductivity persistence of **1** (a), and Im@**1** (b) at 100% RH, 75% RH, and 45% RH. PXRD patterns after impedance measurements (c), and (d).

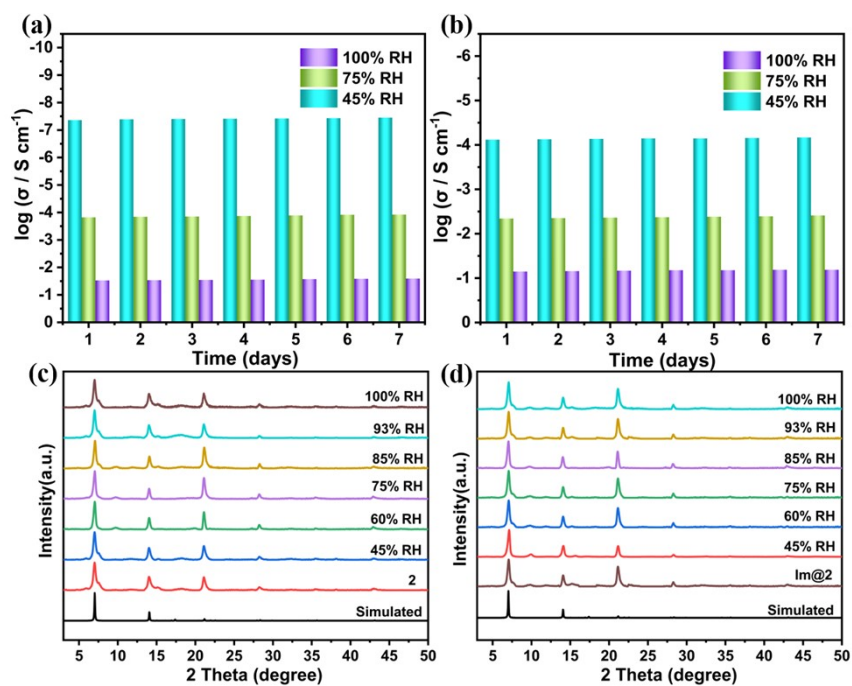

**Figure S21.** Proton conductivity persistence of **2** (a), and Im@**2** (b) at 100% RH, 75% RH, and 45% RH. PXRD patterns after impedance measurements (c), and (d).

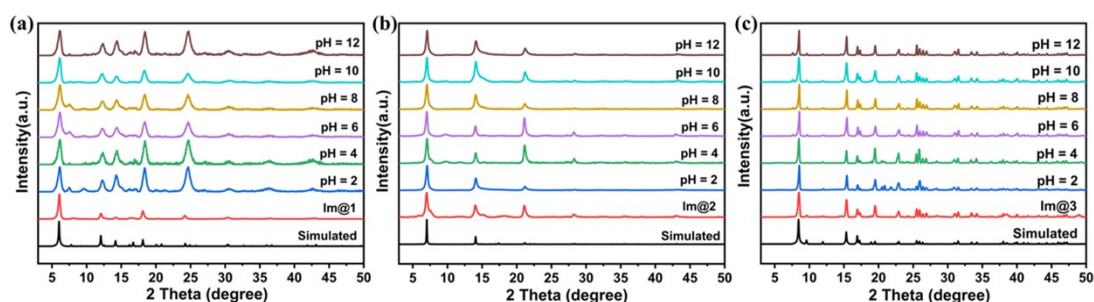

**Figure S22.** The PXRD patterns of simulated, synthesized Im@**1-3** and the samples of Im@**1-3** underwent proton conduction tests and were then immersed in aqueous solutions at different pH for 24 h.

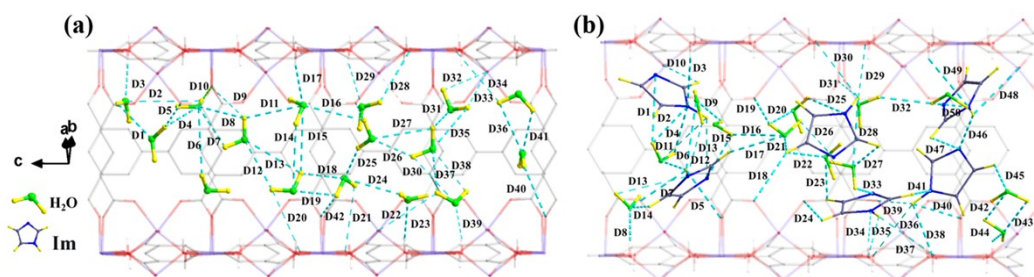

**Figure S23.** The hydrogen-bonding distances of **3** (a), and Im@**3** (b) range from 1.8 to 3.5 Å (thick dotted line), and from 3.5 to 4.0 Å (thin dotted line). (The H atom of MOFs has been omitted for clarity).

**Table S10.** Hydrogen-bonding and distances in **3**

| Hydrogen-bonding | Distance (Å) | Hydrogen bonding | Distance (Å) | Hydrogen-bonding | Distance (Å) |
|------------------|--------------|------------------|--------------|------------------|--------------|
| D1               | 3.469        | D15              | 2.804        | D29              | 3.684        |
| D2               | 3.942        | D16              | 2.994        | D30              | 3.655        |
| D3               | 2.982        | D17              | 2.908        | D31              | 3.351        |
| D4               | 3.076        | D18              | 2.975        | D32              | 3.808        |
| D5               | 3.835        | D19              | 3.421        | D33              | 3.921        |
| D6               | 2.430        | D20              | 3.735        | D34              | 3.697        |
| D7               | 3.426        | D21              | 3.892        | D35              | 3.017        |
| D8               | 3.253        | D22              | 3.915        | D36              | 3.230        |
| D9               | 3.648        | D23              | 3.469        | D37              | 2.653        |
| D10              | 3.973        | D24              | 2.763        | D38              | 3.931        |
| D11              | 2.719        | D25              | 2.813        | D39              | 3.770        |
| D12              | 3.012        | D26              | 3.471        | D40              | 3.165        |
| D13              | 3.443        | D27              | 3.071        | D41              | 3.312        |
| D14              | 3.334        | D28              | 1.861        | D42              | 2.642        |

**Table S11.** Hydrogen bonding and distances in **Im@3**

| Hydrogen-bonding | Distance (Å) | Hydrogen-bonding | Distance (Å) | Hydrogen-bonding | Distance (Å) |
|------------------|--------------|------------------|--------------|------------------|--------------|
| D1               | 1.804        | D19              | 3.402        | D37              | 3.574        |
| D2               | 3.035        | D20              | 2.135        | D38              | 2.791        |
| D3               | 2.864        | D21              | 2.642        | D39              | 3.882        |
| D4               | 2.848        | D22              | 2.775        | D40              | 2.491        |
| D5               | 3.312        | D23              | 2.169        | D41              | 2.453        |
| D6               | 3.001        | D24              | 2.853        | D42              | 3.029        |
| D7               | 3.327        | D25              | 3.503        | D43              | 2.362        |
| D8               | 2.568        | D26              | 3.921        | D44              | 2.711        |
| D9               | 3.420        | D27              | 1.827        | D45              | 3.385        |
| D10              | 3.913        | D28              | 3.265        | D46              | 3.084        |
| D11              | 3.940        | D29              | 3.518        | D47              | 3.384        |

|     |       |     |       |     |       |
|-----|-------|-----|-------|-----|-------|
| D12 | 3.834 | D30 | 3.522 | D48 | 3.303 |
| D13 | 3.764 | D31 | 3.902 | D49 | 3.382 |
| D14 | 3.408 | D32 | 3.057 | D50 | 2.729 |
| D15 | 1.882 | D33 | 2.679 |     |       |
| D16 | 3.135 | D34 | 3.610 |     |       |
| D17 | 2.665 | D35 | 3.547 |     |       |
| D18 | 2.817 | D36 | 3.543 |     |       |

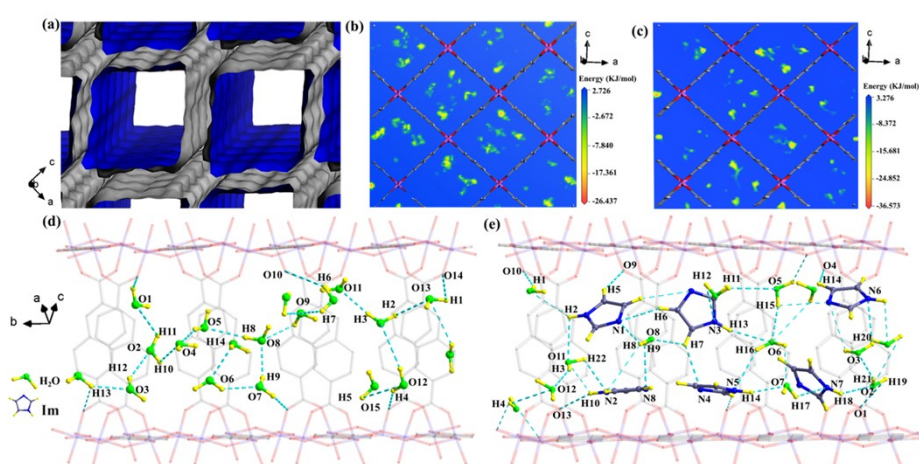

**Figure S24.** Surface view of the porous structure of **2** along the crystallographic *b* axis (a). Slices of the potential field for water (b), and imidazole (c) molecules in **2** along the *b* axis. Diagrams of hydrogen-bonding networks in the **2** (d), and Im@**2** (e) channels along the *b* axis by GCMC simulations. The hydrogen-bonding distances range from 2.4 to 3.5 Å (thick dotted line), and from 3.5 to 4.0 Å (thin dotted line). (The H atom of MOFs has been omitted for clarity).

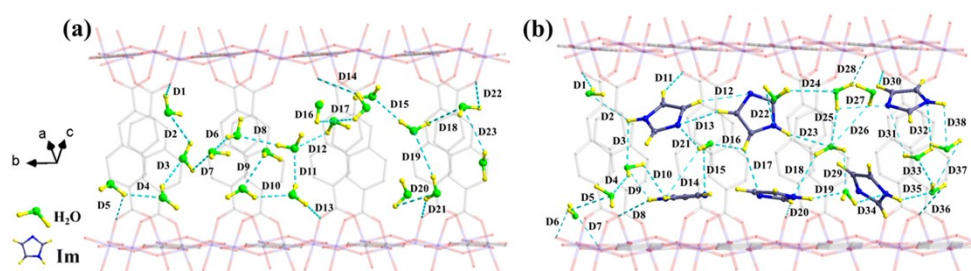

**Figure S25.** The hydrogen-bonding distances of **2** (a), and Im@**2** (b) range from 2.4 to 3.5 Å (thick dotted line), and from 3.5 to 4.0 Å (thin dotted line). (The H atom of MOFs has been omitted for clarity).

**Table S12.** Hydrogen-bonding and distances in **2**

| Hydrogen-bonding | Distance (Å) | Hydrogen-bonding | Distance (Å) | Hydrogen-bonding | Distance (Å) |
|------------------|--------------|------------------|--------------|------------------|--------------|
| D1               | 3.243        | D9               | 3.053        | D17              | 2.699        |
| D2               | 2.911        | D10              | 3.841        | D18              | 2.790        |
| D3               | 2.910        | D11              | 3.252        | D19              | 3.823        |
| D4               | 3.720        | D12              | 3.859        | D20              | 3.317        |
| D5               | 3.921        | D13              | 3.951        | D21              | 3.177        |
| D6               | 2.484        | D14              | 3.339        | D22              | 3.421        |
| D7               | 3.447        | D15              | 3.395        | D23              | 3.788        |
| D8               | 3.243        | D16              | 3.811        |                  |              |

**Table S13.** Hydrogen-bonding and distances in Im@2

| Hydrogen-bonding | Distance (Å) | Hydrogen-bonding | Distance (Å) | Hydrogen-bonding | Distance (Å) |
|------------------|--------------|------------------|--------------|------------------|--------------|
| D1               | 3.440        | D14              | 3.820        | D27              | 3.689        |
| D2               | 3.764        | D15              | 3.490        | D28              | 3.733        |
| D3               | 2.644        | D16              | 3.430        | D29              | 3.824        |
| D4               | 2.975        | D17              | 2.879        | D30              | 3.435        |
| D5               | 2.640        | D18              | 3.439        | D31              | 3.927        |
| D6               | 3.950        | D19              | 3.431        | D32              | 3.376        |
| D7               | 2.902        | D20              | 3.792        | D33              | 2.823        |
| D8               | 2.434        | D21              | 3.267        | D34              | 3.452        |
| D9               | 3.851        | D22              | 3.083        | D35              | 3.427        |
| D10              | 3.821        | D23              | 3.435        | D36              | 3.494        |
| D11              | 2.746        | D24              | 3.471        | D37              | 3.870        |
| D12              | 3.684        | D25              | 3.413        | D38              | 3.762        |
| D13              | 3.055        | D26              | 3.741        |                  |              |



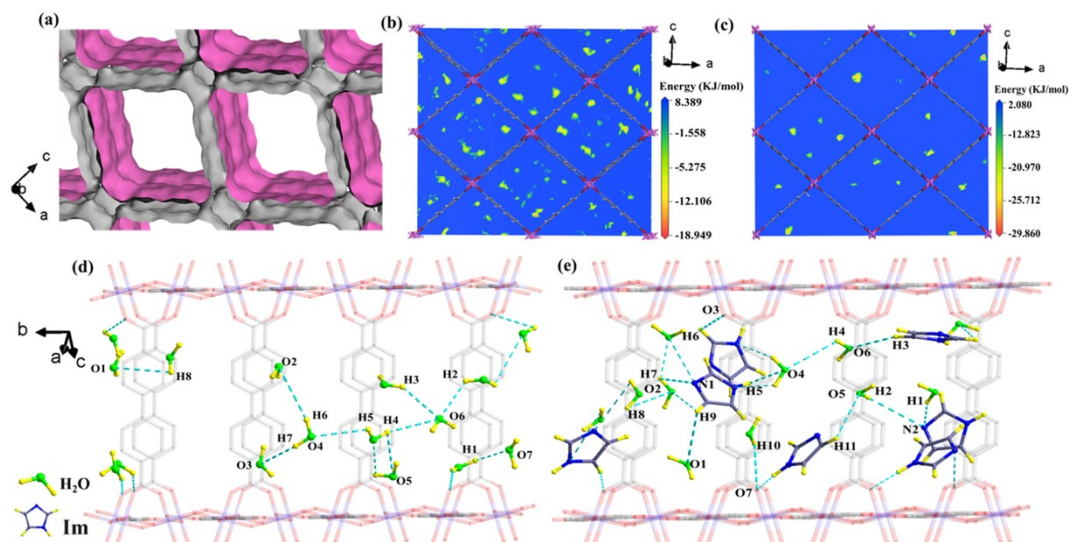

**Figure S26.** Surface view of the porous structure of **1** along the crystallographic *b* axis (a). Slices of the potential field for water (b), and imidazole (c) molecules in **1** along the *b* axis. Diagrams of hydrogen-bonding networks in the **1** (d), and Im@**1** (e) channels along the *b* axis by GCMC simulations. The hydrogen-bonding distances range from 3.1 to 3.5 Å (thick dotted line), and from 3.5 to 4.0 Å (thin dotted line). (The H atom of MOFs has been omitted for clarity).

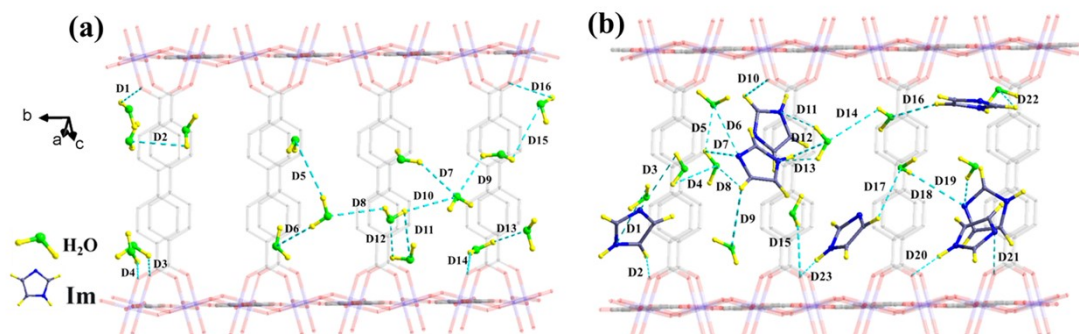

**Figure S27.** The hydrogen-bonding distances of **1** (a), and Im@**1** (b) range from 3.1 to 3.5 Å (thick dotted line), and from 3.5 to 4.0 Å (thin dotted line). (The H atom of MOFs has been omitted for clarity).

**Table S14.** Hydrogen bonding and distance in **1**

| Hydrogen-Bonding | Distance (Å) | Hydrogen-Bonding | Distance (Å) | Hydrogen-Bonding | Distance (Å) |
|------------------|--------------|------------------|--------------|------------------|--------------|
| D1               | 3.944        | D7               | 3.593        | D13              | 3.528        |
| D2               | 3.530        | D8               | 3.589        | D14              | 3.923        |

|    |       |     |       |     |       |
|----|-------|-----|-------|-----|-------|
| D3 | 3.926 | D9  | 3.502 | D15 | 3.878 |
| D4 | 3.890 | D10 | 3.549 | D16 | 3.862 |
| D5 | 3.480 | D11 | 3.496 |     |       |
| D6 | 3.284 | D12 | 3.711 |     |       |

**Table S15.** Hydrogen-bonding and distances in Im@1

| Hydrogen-bonding | Distance (Å) | Hydrogen-bonding | Distance (Å) | Hydrogen-bonding | Distance (Å) |
|------------------|--------------|------------------|--------------|------------------|--------------|
| D1               | 3.795        | D10              | 3.252        | D19              | 3.908        |
| D2               | 3.358        | D11              | 3.219        | D20              | 3.343        |
| D3               | 3.998        | D12              | 2.537        | D21              | 3.583        |
| D4               | 3.485        | D13              | 3.644        | D22              | 3.681        |
| D5               | 3.270        | D14              | 3.390        | D23              | 3.652        |
| D6               | 3.058        | D15              | 3.086        | D24              | 3.286        |
| D7               | 3.290        | D16              | 3.896        | D25              | 3.631        |
| D8               | 3.886        | D17              | 3.492        | D26              | 3.758        |
| D9               | 3.116        | D18              | 3.798        |                  |              |

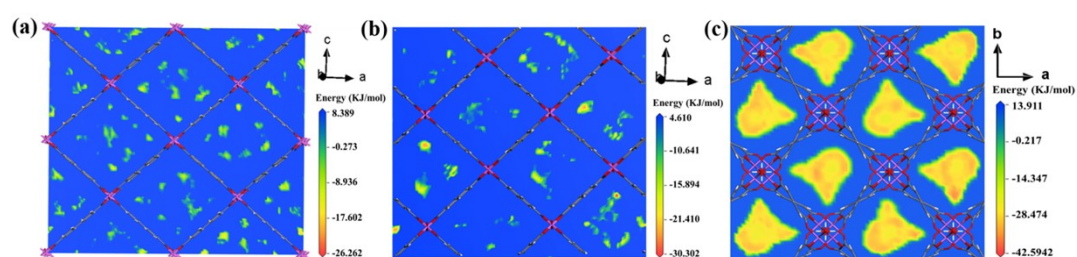

**Figure S28.** Slices of the potential field for water and imidazole molecules in **1** (a), **2** (b) along the *b* axis and in **3** (c) along the *c* axis.

## 6. References.

- 1 H. B. Luo, Q. Ren, P. Wang, J. Zhang, L. Wang and X. M. Ren, High Proton Conductivity Achieved by Encapsulation of Imidazole Molecules into Proton-Conducting MOF-808, *ACS Appl. Mater. Inter.*, 2019, **11**(9), 9164-9171.
- 2 Y. Ye, W. Guo, L. Wang, Z. Li, Z. Song, J. Chen, Z. Zhang, S. Xiang, and B. Chen, Straightforward Loading of Imidazole Molecules into Metal-Organic Framework

- for High Proton Conduction, *J. Am. Chem. Soc.*, 2017, **139**(44), 15604-15607.
- 3 F. M. Zhang, L. Z. Dong, J. S. Qin, W. Guan, J. Liu, S. L. Li, M. Lu, Y. Q. Lan, Z. M. Su and H. C. Zhou, Effect of Imidazole Arrangements on Proton-Conductivity in Metal-Organic Frameworks, *J. Am. Chem. Soc.*, 2017, **139**(17), 6183-6189.
  - 4 S. Liu, Z. Yue and Y. Liu, Incorporation of Imidazole within the Metal-Organic Framework UiO-67 for Enhanced Anhydrous Proton Conductivity, *Dalton Trans.*, 2015, **44**, 12976-12980.
  - 5 H. Xu, S. Tao and D. Jiang, Proton Conduction in Crystalline and porous Covalent Organic Frameworks, *Nat. Mater.*, 2016, **15**, 722-726.
  - 6 Y. Prykhodko, K. Fatyeyeva, L. Hespel and S. Marais, Progress in hybrid composite Nafion®-based membranes for proton exchange fuel cell application, *Chem. Eng. J.*, 2021, **409**(1), No. 127329.
  - 7 J. M. Taylor, R. K. Mah, I. L. Moudrakovski, C. I. Ratcliffe, R. Vaidhyanathan and G. K. H. Shimizu, Facile proton conduction via ordered water molecules in a phosphonate metal-organic framework, *J. Am. Chem. Soc.*, 2010, **132**(40), 14055-14057.
  - 8 A. Shigematsu, T. Yamada and H. Kitagawa, Wide control of proton conductivity in porous coordination polymers, *J. Am. Chem. Soc.*, 2011, **133**(7), 2034-2036.
  - 9 T. Panda, T. Kundu and R. Banerjee, Structural isomerism leading to variable proton conductivity in indium(iii) isophthalic acid based frameworks, *Chem. Commun.*, 2013, **49**(55), 6197-6199.
  - 10 J. M. Taylor, K. W. Dawson and G. K. H. Shimizu, A water-stable metal-organic framework with highly acidic pores for proton-conducting applications, *J. Am. Chem. Soc.*, 2013, **135**(4), 1193-1196.
  - 11 S. R.; Kim, K. W. Dawson, B. S. Gelfand, J. M. Taylor and G. K. H. Shimizu, Enhancing Proton Conduction in a Metal-Organic Framework by Isomorphous Ligand Replacement, *J. Am. Chem. Soc.*, 2013, **135**(3), 963-966.
  - 12 X.-M. Li, J. Liu, C. Zhao, J.-L. Zhou, L. Zhao, S.-L. Li and Y.-Q. Lan, Strategic hierarchical improvement of superprotonic conductivity in a stable metal-organic framework system, *J. Mater. Chem. A*, 2019, **7**, 25165-25171.

- 13 P. Barbosa, N. C. Rosero-Navarro, F. N. Shi and F. M. L. Figueiredo, Protonic Conductivity of Nanocrystalline Zeolitic Imidazolate Framework 8, *Electrochim. Acta*, 2015, **153**(20), 19-27.
- 14 P. Ramaswamy, N. E. Wong, B. S. Gelfand and G. K. H. Shimizu, A Water Stable Magnesium MOF That Conducts Protons over  $10^{-2}$  S cm<sup>-1</sup>, *J. Am. Chem. Soc.*, 2015, **137**(24), 7640-7643.
- 15 W. J. Phang, H. Jo, W. R. Lee, J. H. Song, K. Yoo, B. S. Kim and C. S. Hong, Superprotonic Conductivity of a UiO-66 Framework Functionalized with Sulfonic Acid Groups by Facile Postsynthetic Oxidation, *Angew. Chem. Int. Ed.*, 2015, **54**(17), 5142-5146.
- 16 D. D. Borges, S. Devautour-Vinot, H. Jobic, J. Ollivier, F. Nouar, R. Semino, T. Devic, C. Serre, F. Paesani and G. Maurin, Proton Transport in a Highly Conductive Porous Zirconium-Based Metal-Organic Framework: Molecular Insight, *Angew. Chem. Int. Ed.*, 2016, **55**(12), 3919-3924.
- 17 T. N. Tu, Phan, N. Q.; Vu, T. T.; Nguyen, H. L.; Cordova, K. E.; Furukawa, H. High proton conductivity at low relative humidity in an anionic Fe-based metal-organic framework, *J. Mater. Chem. A.*, 2016, **4**, 3638-3641.
- 18 N. T. T. Nguyen, H. Furukawa, F. Gándara, C. A. Trickett, H. M. Jeong, K. E. Cordova and O. M. Yaghi, Three-Dimensional Metal-Catecholate Frameworks and Their Ultrahigh Proton Conductivity, *J. Am. Chem. Soc.*, 2015, **137**(49), 15394-15397.
- 19 S. Wang, M. Wahiduzzaman, L. Davis, A. Tissot, W. Shepard, J. Marrot, C. Martineau-Corcós, D. Hamdane, G. Maurin, S. Devautour-Vinot and C. Serre, A robust zirconium amino acid metalorganic framework for proton conduction, *Nat. Commun.*, 2018, **9**, 4937-4944.
- 20 H. M. Ren, Y. R. Liu, B. Y. Liu, Z. F. Li and G. Li, Comparative studies on the proton conductivities of hafnium-based metal-organic frameworks and related chitosan or nafion composite membranes, *Inorg. Chem.*, 2022, **61**(25), 9564-9579.
- 21 L. L. Kang, C. Xing, Y. X. Jin, L. X. Xie, Z. F. Li and G. Li, Two dual-function Zr/Hf-MOFs as high-performance proton conductors and amines impedance sensors, *Inorg. Chem.*, 2023, **62**, 3036-3046.

- 22 P. G. M. Mileo, S. Devautour-Vinot, G. Mouchaham, F. Faucher, N. Guillou, A. Vimont, C. Serre and G. Maurin, Protonconducting phenolate-based Zr metal-organic framework: a joint experimental-modeling investigation, *J. Phys. Chem. C*, 2016, **120**(43), 24503-24510.
- 23 X. Chen, S.-Z. Wang, S.-H. Xiao, Z.-F. Li and G. Li, High Protonic Conductivity of Three Highly Stable Nanoscale Hafnium(IV) Metal-Organic Frameworks and Their Imidazole-Loaded Products, *Inorg. Chem.*, 2022, **61**(12), 4938-4947.
- 24 F. Yang, G. Xu, Y. Dou, B. Wang, H. Zhang, H. Wu, W. Zhou, J.-R. Li and B. Chen, A flexible metal-organic framework with a high density of sulfonic acid sites for proton conduction, *Nat. Energy*, 2017, **2**, 877-883.
- 25 S. Hwang, E. J. Lee, S. Dahae and N. C. Jeong, High proton mobility with high directionality in isolated channels of MOF-74, *ACS Appl. Mater. Inter.*, 2018, **10**(41), 35354-35360.
